# Supplementary material
Source: publisher figshare collection journal article supplement (https://gsajournals.figshare.com/ndownloader/files/26470682)
Supplement: Supplementary file 1 [file 26470682]

| **Table S1 Primers used in this study for reverse transcript PCR or sequencing.** | | | |
| --- | --- | --- | --- |
| **lncRNAs ID** | **Forward primer: 5′-3′** | **Reverse primer: 5′-3′** | **Description** |
| TCONS_00126563 | AACTATGAACAGATGATGGTTAG | CACAGTCCGATAAATATCATTC | common lincRNA |
| TCONS_00001000 | TCATTCTCTCACCCCCATCT | CACAAATTTACAGATCCAAACACAT | common lincRNA |
| TCONS_00042272 | TTACCCACAAAAATAGTTTCTGTCC | CGGATAACAAGGGGCGACT | common lincRNA |
| TCONS_00044615 | GTATTTTTGAGGTTGGCAC | CAGCTAATCAGTACTACTAAAGCT | common lincRNA |
| TCONS_00075324 | CATAGTTTTCCTTGACTTTTCTGG | GGCGACCTCATTCGATCTAAT | common lincRNA |
| TCONS_00282321 | TTTATCTGTACCCTTATTGTGGGCT | GATATGGCCTCAGTTTTGCTCAG | mutant specific lincRNA |
| TCONS_00021834 | TTTGCCCCTGTTGTGGCT | TGGCCTCAGTTTTGCTCAGA | mutant specific lincRNA |
| TCONS_00278700 | ATTCGCAGTGGAGCGAAC | AGAGTCACATATCCGTCTAGATTGA | mutant specific lincRNA |
| TCONS_00180193 | CTTTTCTTCTGGATTGATAAATGG | TGGCCTCAGTTTTGCTCAG | mutant specific lincRNA |
| TCONS_00299878 | CAGTCTTATCCATCCGCTTTATATC | AGATCCCCAAATCCCCACAT | mutant specific lincRNA |
| TCONS_00072134 | TCCTGGAATAACTTCTTGCATG | AGGAATAAATGGTGCTACTGGAG | common lncNAT |
| TCONS_00094357 | GGAAACCGTGGATTCACAC | CAAGAATCCCCATAGCTCAAG | common lncNAT |
| TCONS_00071317 | CTACAAACTAACACCAGTGAACATG | GGGTGTTGGAAGATTCTTCAGTAT | common lncNAT |
| TCONS_00002230 | ATAATCACAATCCACGCGCA | ACTCCACCTCCCTAATCCACAG | common lncNAT |
| TCONS_00041451 | CTCAGGTAGACCTACACGGGCA | CAAAAACAAACCCAGACACACAAAC | common lncNAT |
| TCONS_00119416 | GAGCAAACACCGCTGGA | GGTTTTTTGCACTGCTAGATAAT | mutant specific lncNAT |
| TCONS_00288966 | AACAACGAAGACACCATTCAG | ATAAACACTTGTCTAGAACAAACG | mutant specific lncNAT |
| TCONS_00020347 | GGATGTGGCTCGTGACATG | CAAAGACTAAAGACCTTTCCTGC | mutant specific lncNAT |
| TCONS_00116576 | AGGCGCTGCTACTTGC | CGGATGGAGTATTAAATAGGC | mutant specific lncNAT |
| TCONS_00163953 | GGCAACTCGTACGCGAGATAAAG | GCCGATATACTGAAATTTTGATCCG | mutant specific lncNAT |
